# Supplementary material for: Increasing phosphorus supply is not the mechanism by which arbuscular mycorrhiza increase attractiveness of bean (Vicia faba) to aphids
Source: PubMed Central journal article supplement (PMC4157707; doi:10.1093/jxb/eru283), 2014-07-08
Supplement: supp_eru283_jexbot121772_file001.pdf [file supp_eru283_jexbot121772_file001.pdf]

Table S1. Production of volatile organic compounds [ $\text{ng g}^{-1} \text{dw } 24\text{h}^{-1}$ ], which elicit electrophysiological activity on antennae of pea aphids (*Acyrtosiphon pisum* Harris), by broad beans (*Vicia faba* L.) in response to phosphorus (+/- P) and arbuscular mycorrhizal fungal (+/- AM fungi) treatment. Kovats index is the retention time of elution of the compound normalised to the retention times of a series of *n*-alkanes. Asterisks indicate significant effects of treatment on emission ( $P < 0.05$ ; see Fig. 2 and text for details).

| Volatile compounds                                        | Kovats index | Treatment    |              |              |              |
|-----------------------------------------------------------|--------------|--------------|--------------|--------------|--------------|
|                                                           |              | -P -AM fungi | -P +AM fungi | +P -AM fungi | +P +AM fungi |
| ( <i>Z</i> )-2-Hexenal                                    | 817          | 4.08 ± 2.92  | 3.52 ± 1.87  | 3.11 ± 1.46  | 1.98 ± 0.67  |
| ( <i>E</i> )-2-Hexenal                                    | 825          | 1.72 ± 1.72  | 0.83 ± 0.83  | 0.52 ± 0.52  | 0.91 ± 0.45  |
| ( <i>E,E</i> )-2,4-Hexadienal                             | 880          | 39.4 ± 21.6  | 25.5 ± 15.9  | 52.8 ± 48.4  | 16.2 ± 12.8  |
| ( <i>Z</i> )-2-Heptenal                                   | 924          | 129 ± 79     | 104. ± 50.9  | 189 ± 173    | 62.9 ± 48.5  |
| Benzaldehyde                                              | 929          | 500 ± 253    | 97.3 ± 33.3  | 269 ± 240    | 124 ± 60.5   |
| 6-Methyl-5-hepten-2-one                                   | 967          | 16.2 ± 5.91  | 10.1 ± 7.0   | 16.5 ± 15.0  | 6.10 ± 3.28  |
| ( <i>R,S</i> )- $\beta$ -Pinene                           | 972          | 39.4 ± 20.2  | 6.42 ± 2.51  | 22.2 ± 20.1  | 7.65 ± 4.48  |
| ( <i>Z</i> )-3-Hexenyl acetate                            | 986          | 77.4 ± 32.1  | 40.9 ± 9.2   | 45.4 ± 19.9  | 45.0 ± 22.1  |
| ( <i>S</i> )-Linalool *                                   | 1086         | 1806 ± 1088  | 93.1 ± 36.9  | 1080 ± 1052  | 374 ± 251    |
| Naphthalene *                                             | 1168         | 57.9 ± 24.9  | 29.3 ± 13.9  | 48.9 ± 28.5  | 9.9 ± 4.8    |
| Methyl salicylate                                         | 1172         | 16.2 ± 13.6  | 6.22 ± 4.38  | 4.42 ± 3.32  | 1.90 ± 1.65  |
| Cinnamaldehyde                                            | 1232         | 146 ± 64.4   | 50.1 ± 27.8  | 154 ± 137    | 12.4 ± 6.5   |
| ( <i>E</i> )-Caryophyllene *                              | 1424         | 731 ± 417    | 99.4 ± 44.7  | 231 ± 125    | 281 ± 177    |
| ( <i>E</i> )- $\beta$ -Farnesene                          | 1450         | 7.22 ± 3.21  | 2.58 ± 0.88  | 9.85 ± 8.71  | 1.52 ± 0.79  |
| ( <i>R</i> )-Germacrene D *                               | 1486         | 385 ± 218    | 45.8 ± 21.1  | 96.3 ± 73.0  | 136 ± 84.5   |
| ( <i>E,E</i> )-4,8,12-Trimethyl-1,3,7,11- tridecatetraene | 1570         | 109 ± 34.2   | 55.1 ± 8.8   | 79.1 ± 35.8  | 93.4 ± 50.7  |
| Total production                                          |              | 4051 ± 2033  | 665 ± 185    | 2298 ± 1900  | 1174 ± 630   |
